# Supplementary material
Source: PubMed Central journal article supplement (PMC5880100)
Supplement: supp_TIR117.000302_4934_2_supp_55708_p2mdxm.pdf [file supp_TIR117.000302_4934_2_supp_55708_p2mdxm.pdf]

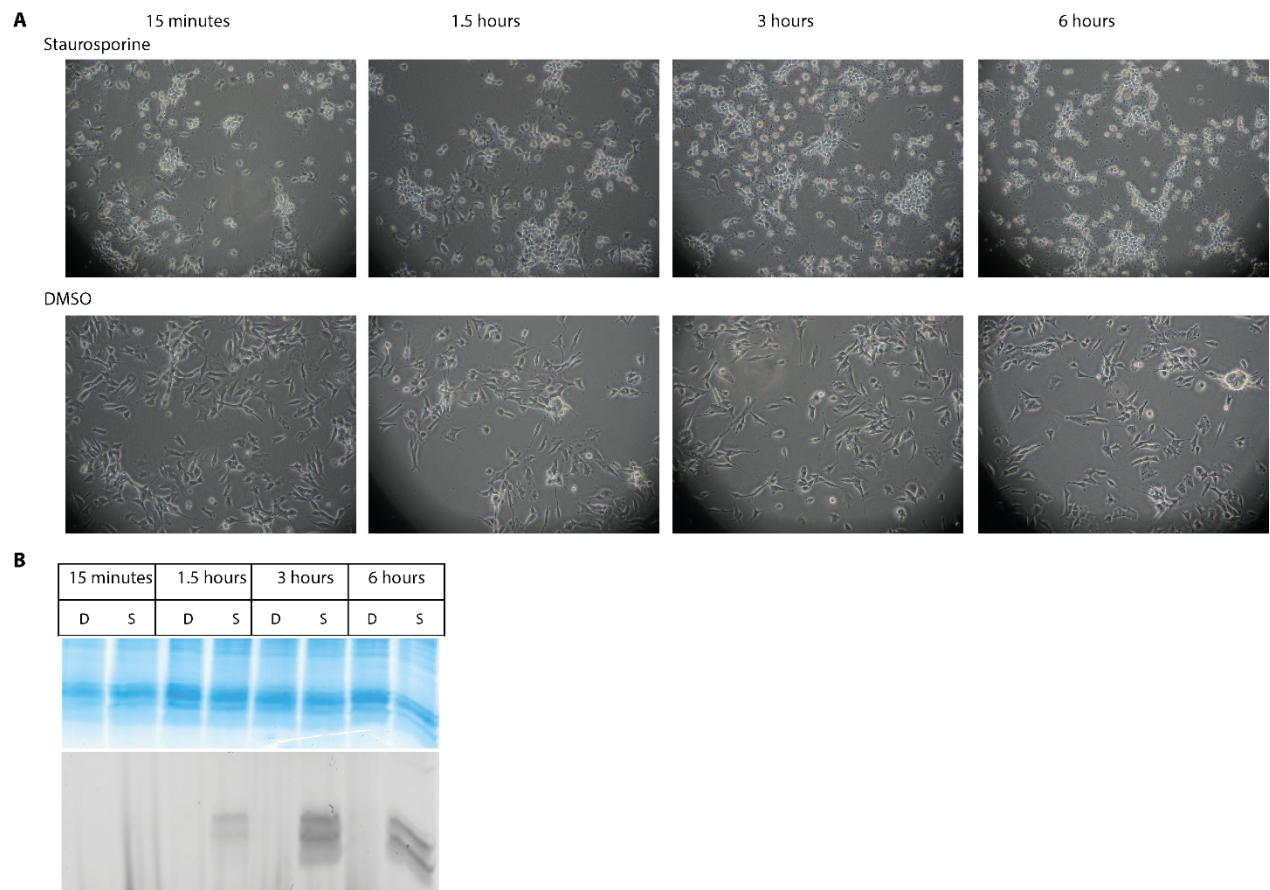

**Supplemental Figure 2:** SH-SY5Y cells were treated at 37°C with staurosporine (1 $\mu$ M) or DMSO for 15 minutes, 1.5, 3 and 6 hours. (A) Morphological changes of staurosporine versus DMSO-treated SH-SY5Y cells after each time point under microscope. (B) Cell lysates harvested from each time point of treatment were labelled with a fluorescent activity based probe for labelling active caspase proteases, consisting of an acyloxymethyl reactive group and a Glu-Val-Asp peptide element. The labelling reactions were resolved on SDS-PAGE as well as visualized by fluorescent scanning of the TAMRA fluorescence using a Typhoon Trio+ (D: DMSO, S: Staurosporine). Active caspases appear to be labelled after 1.5 hours of staurosporine treatment indicating activation of caspases in staurosporine-induced apoptosis.
