# Supplementary material
Source: PubMed Central journal article supplement (PMC5880100)
Supplement: supp_TIR117.000302_4934_2_supp_55711_p2mdxm.pdf [file supp_TIR117.000302_4934_2_supp_55711_p2mdxm.pdf]

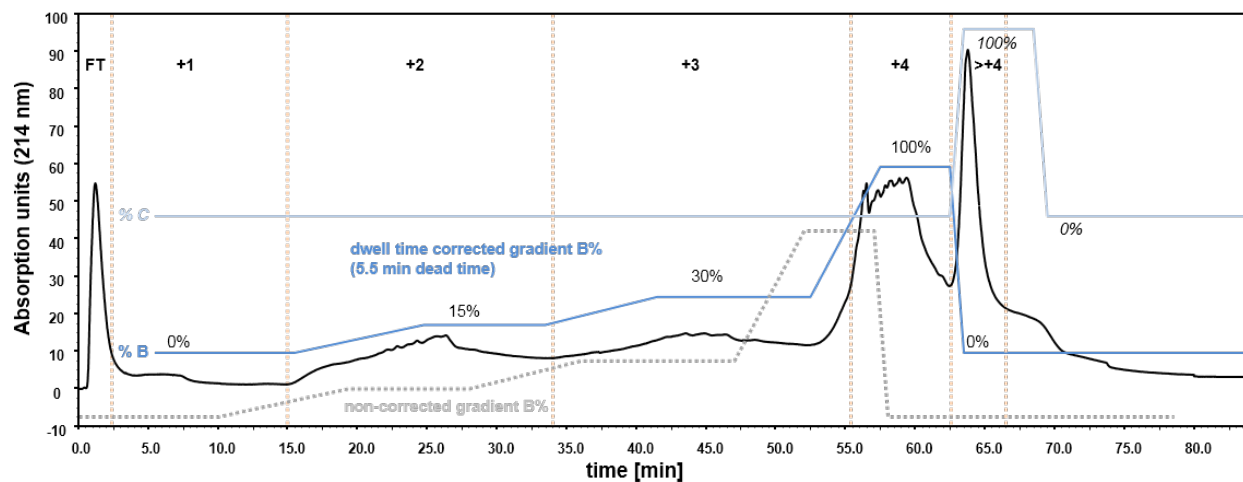

**Supplemental Figure 1. Scheme of the HPLC gradient used for the first and second ChaFRADIC dimensions.** Fractions are indicated by vertical dashed lines. The gradients for B% and C% are indicated as blue straight lines, considering the dead time of 5.5 min of the system. Additionally, the HPLC gradient as programmed for the pump is indicated as dashed grey line. The UV trace is depicted as black line.
